# Supplementary material for: LEGO-block-inspired versatile triboelectric nanogenerators as power cells to harvest vibration energy
Source: Royal Society of Chemistry journal article supplement (doi:10.1039/d2ta09148h), 2023-01-01
Supplement: d2ta09148h6.pdf [file d2ta09148h6.pdf]

LEGO-block-inspired versatile triboelectric nanogenerator as power cells  
to harvest vibration energy

*Longfa Xiao,<sup>†ab</sup> Heng Ning,<sup>†a</sup> Changyue Zheng,<sup>a</sup> Chuangjian Liang,<sup>a</sup> Haohua Li,<sup>a</sup>*

*Boxun Liu,<sup>a</sup> Zhentao Du,<sup>b</sup> Lingyu Wan,<sup>a</sup> Yan Peng,<sup>c</sup> and Guanlin Liu<sup>\*a</sup>*

<sup>a</sup> Center on Nanoenergy Research, School of Physical Science and Technology, Guangxi University, Nanning 530004, P.R. China

<sup>b</sup> School of Resources, Environment and Materials, Guangxi University, Nanning 530004, P.R. China

<sup>c</sup> School of mechatronic Engineering, Shanghai University, Shanghai, 200444, P.R. China

<sup>†</sup> These authors contributed equally to this work.

<sup>\*</sup> E-mail: [guanlinliu@gxu.edu.cn](mailto:guanlinliu@gxu.edu.cn)

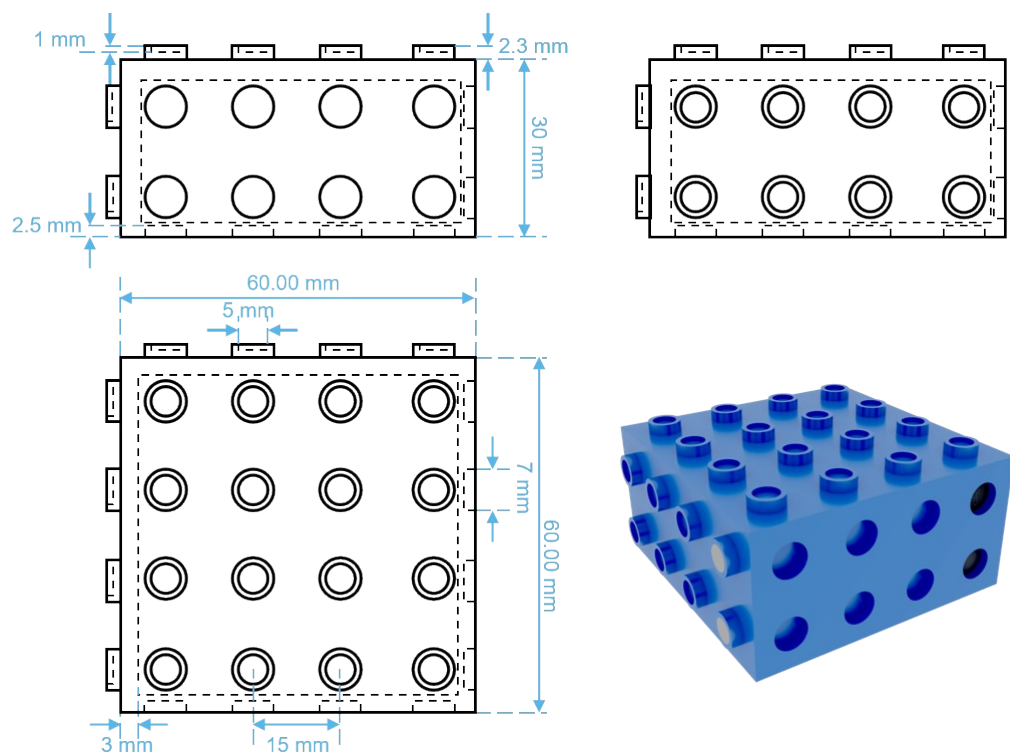

**Fig. S1** Shell size of LI-TENG.

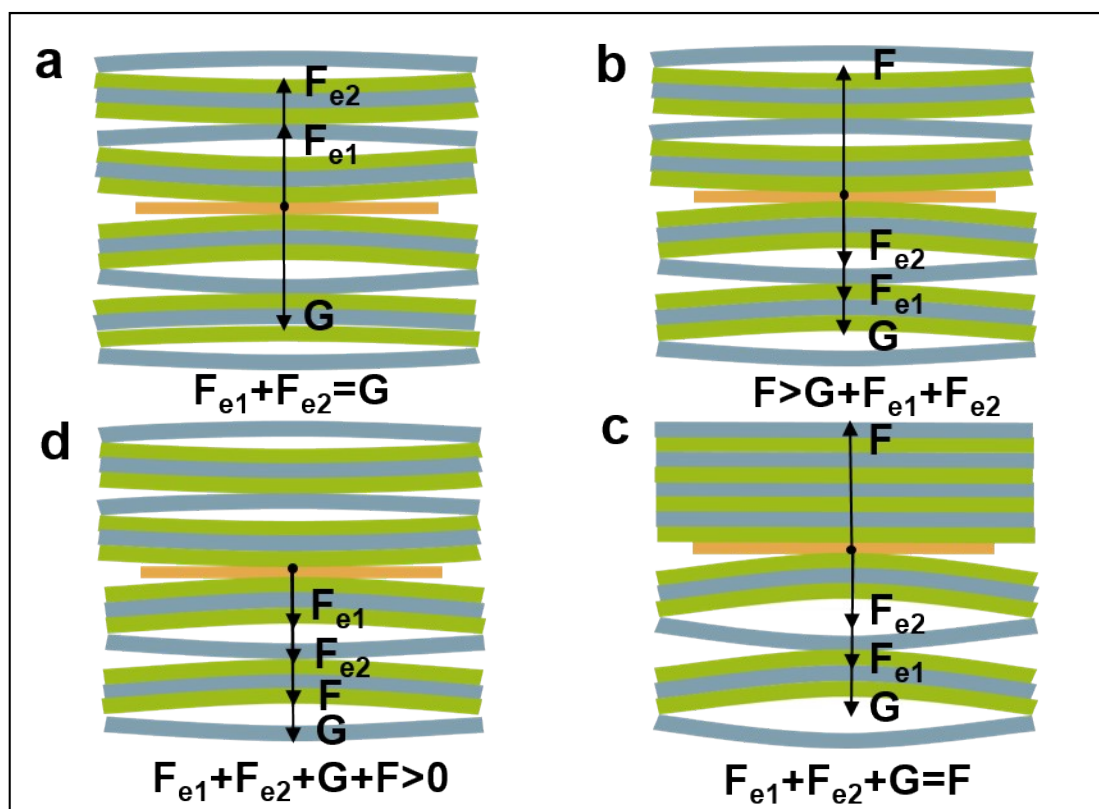

**Fig. S2** The force analysis diagram for four different states.

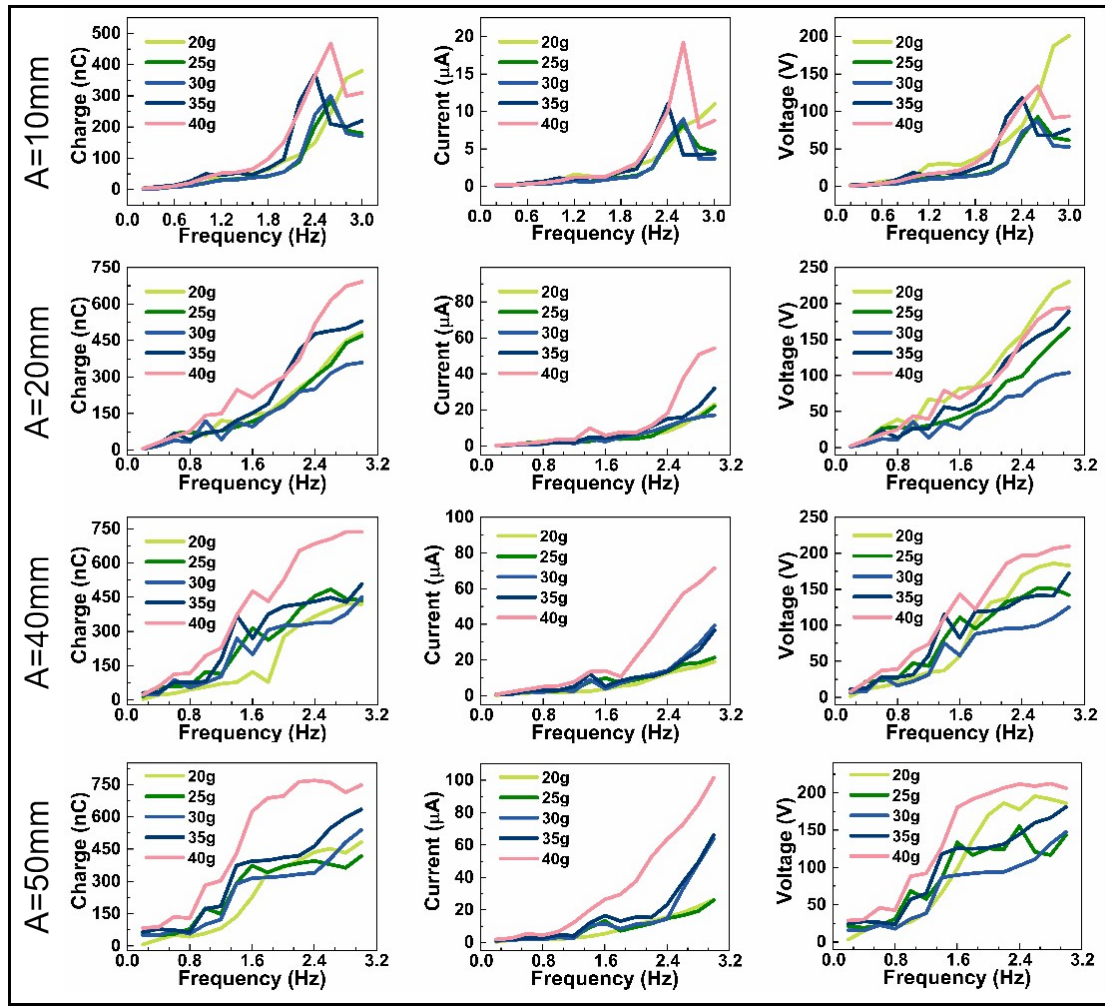

**Fig. S3** Short-circuit charge transfer, short-circuit current and open-circuit voltage for five LI-TENGs with different copper block masses at fixed amplitudes and different frequencies of the horizontal reciprocating motion of the linear motor.

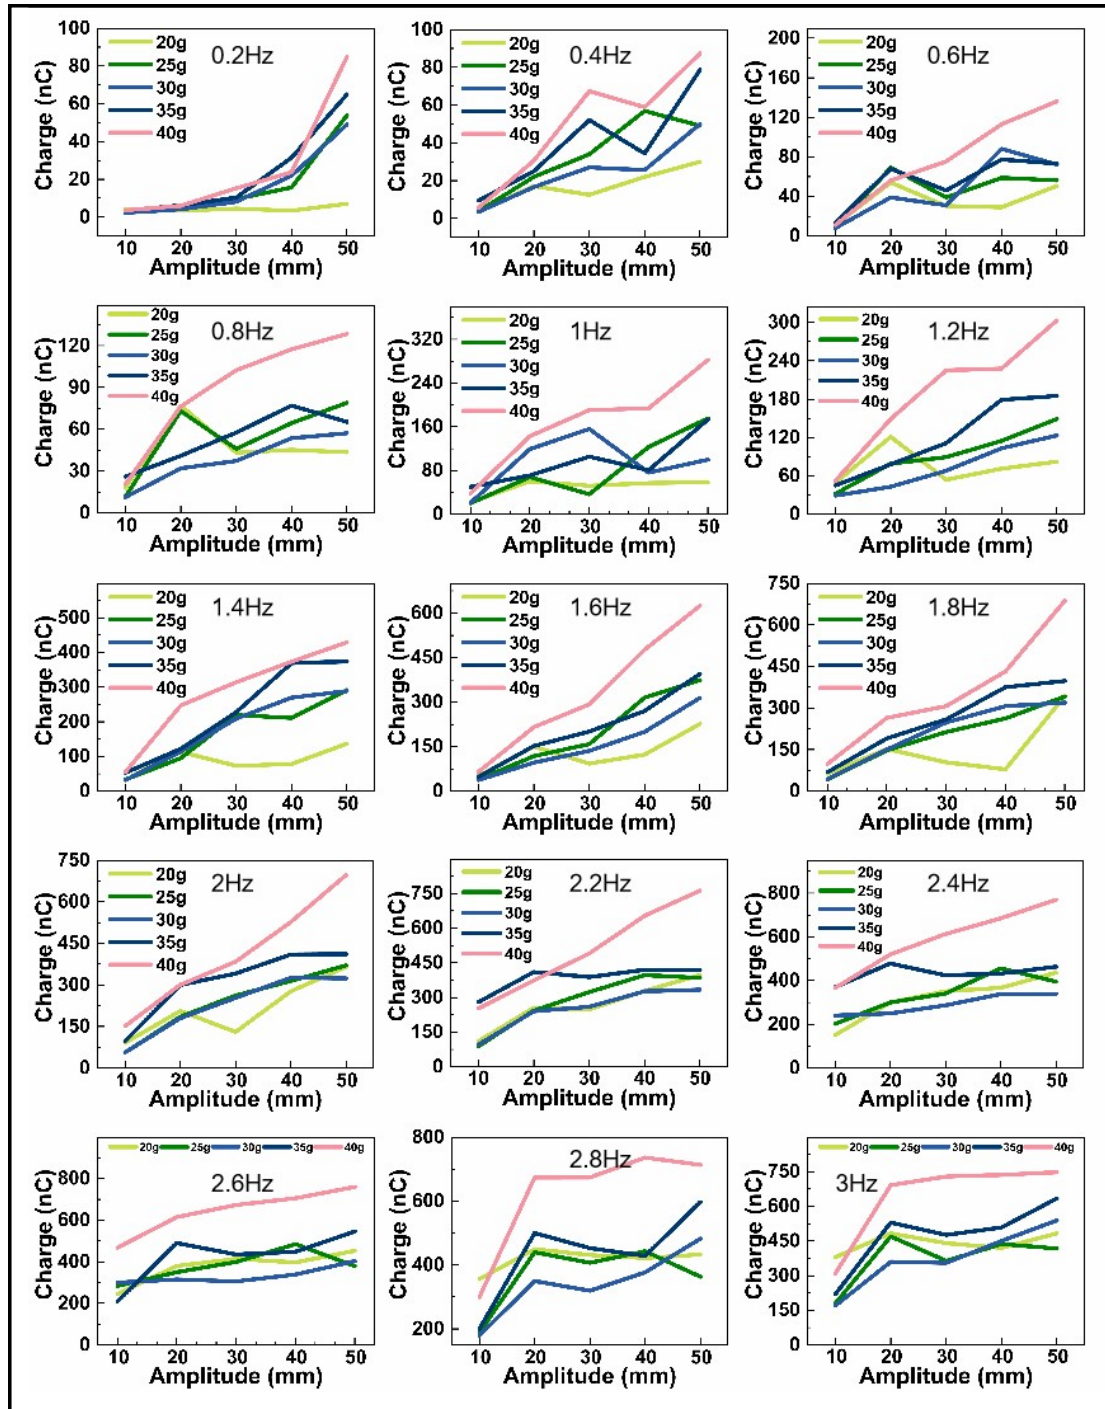

**Fig. S4** Short-circuit charge transfer for five LI-TENGs with different copper masses at fixed frequencies and different amplitudes in the horizontal reciprocating motion of a linear motor.

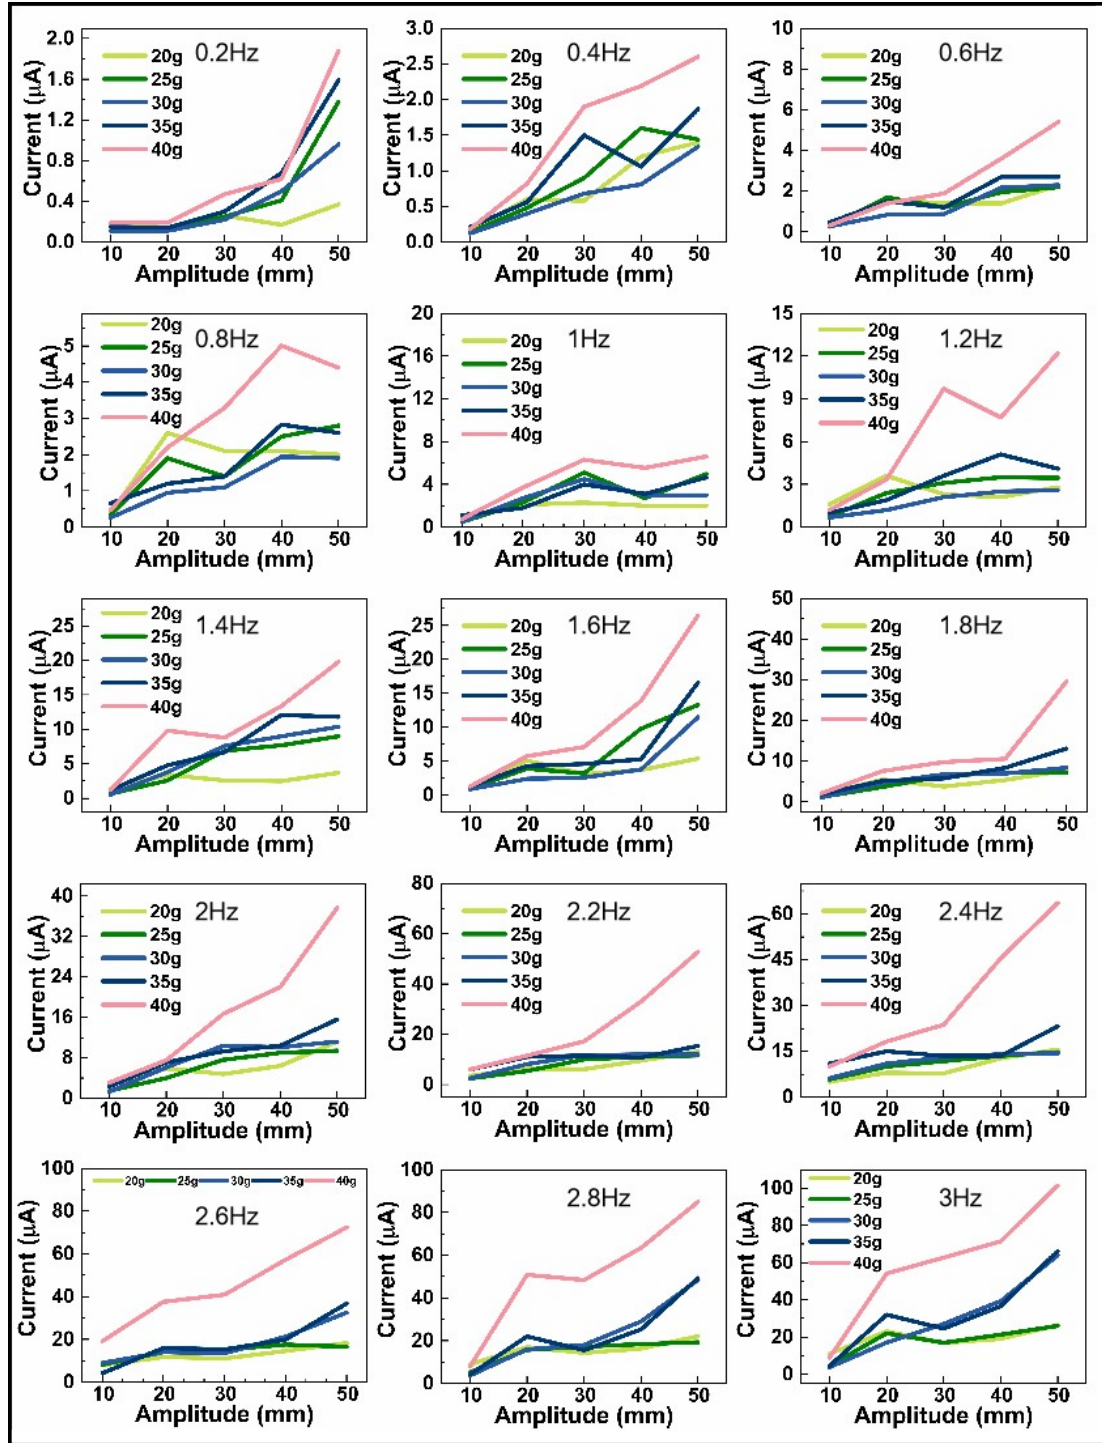

**Fig. S5** Short-circuit currents of five LI-TENGs with different copper block masses at fixed frequencies and different amplitudes in the horizontal reciprocating motion of a linear motor.



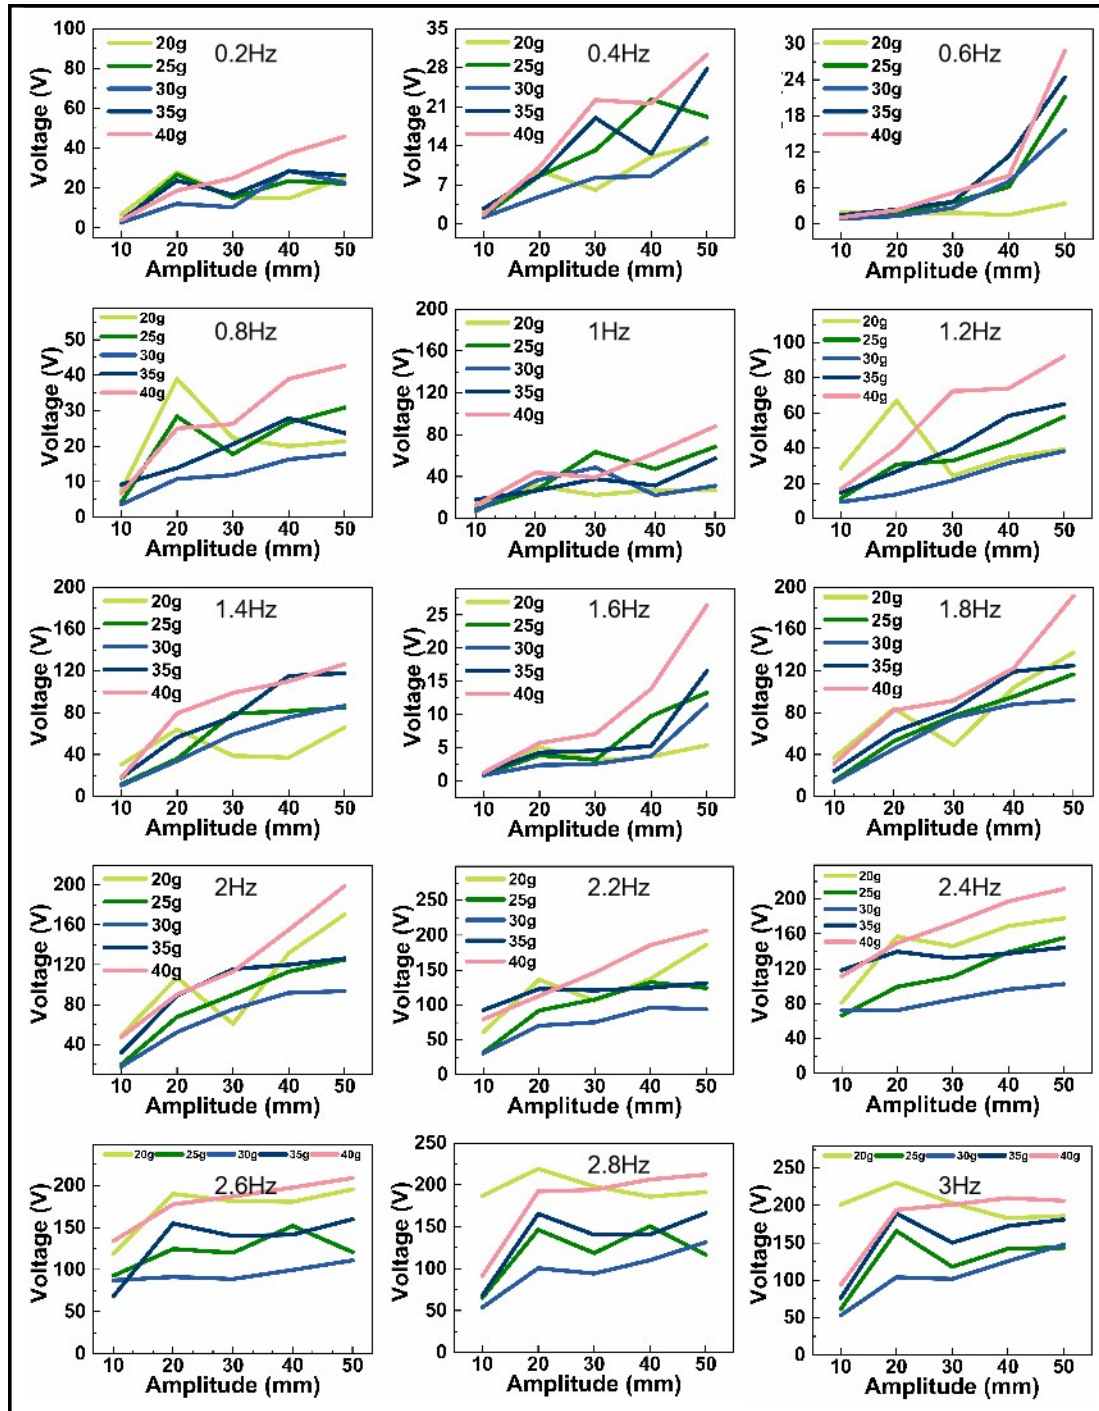

**Fig. S6** Open-circuit voltages of five LI-TENGs with different copper block masses at fixed frequencies and different amplitudes for the horizontal reciprocating motion of a linear motor.

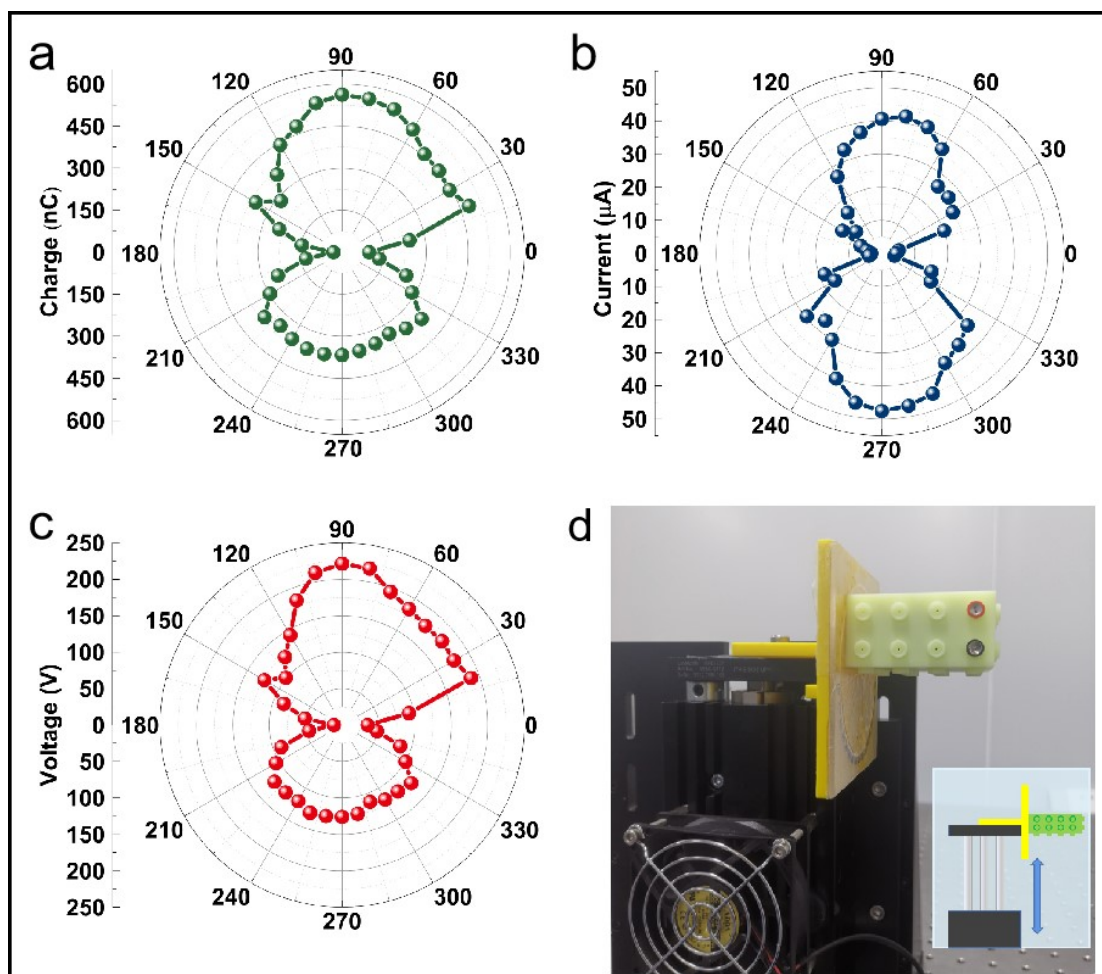

**Fig. S7** The output performance of a single LI-TENG at different  $\alpha$  angles in the vertical direction. (a) Short-circuit transfer charge. (b) Short-circuit current. (c) Open-circuit voltage. (d) Output performance test device at  $\alpha$  angle in the vertical direction.



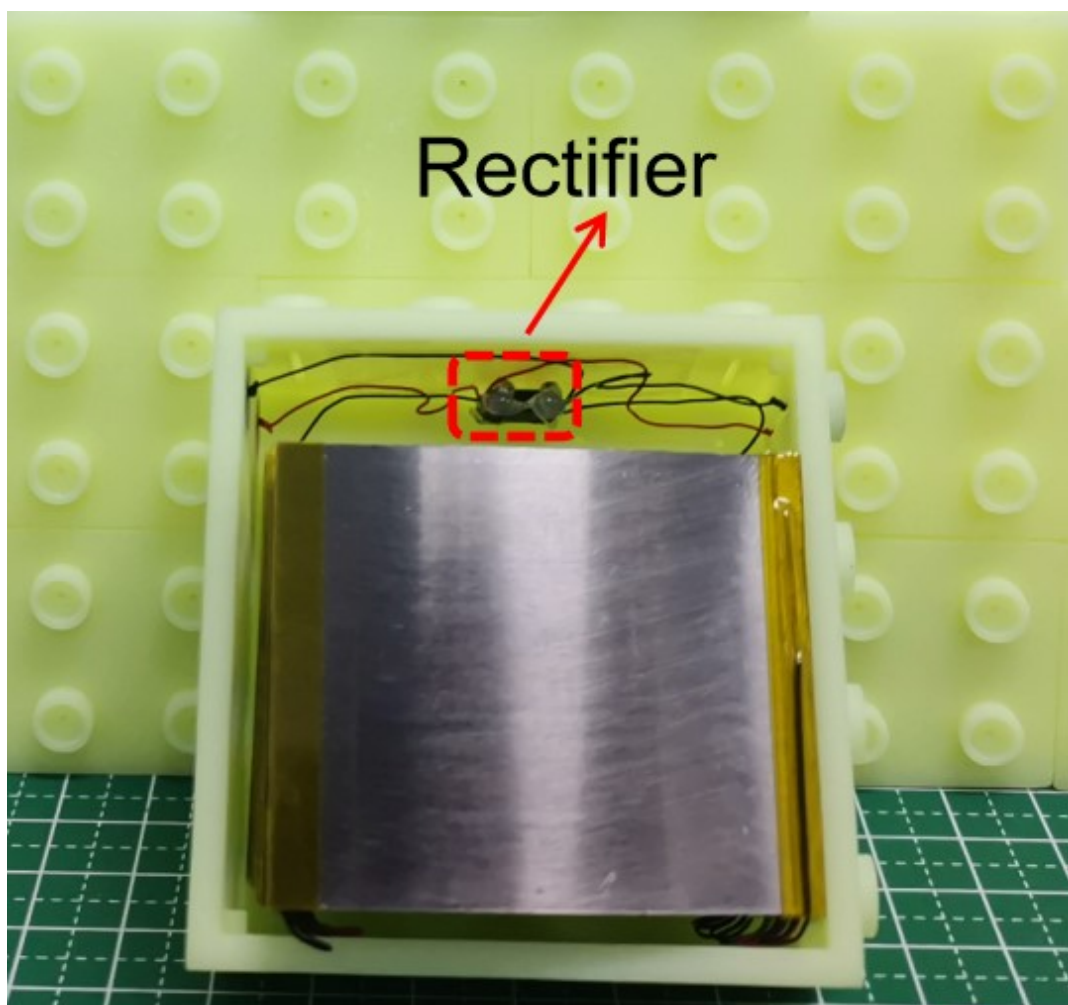

**Fig. S8** LI-TENG internal structure physical photos.

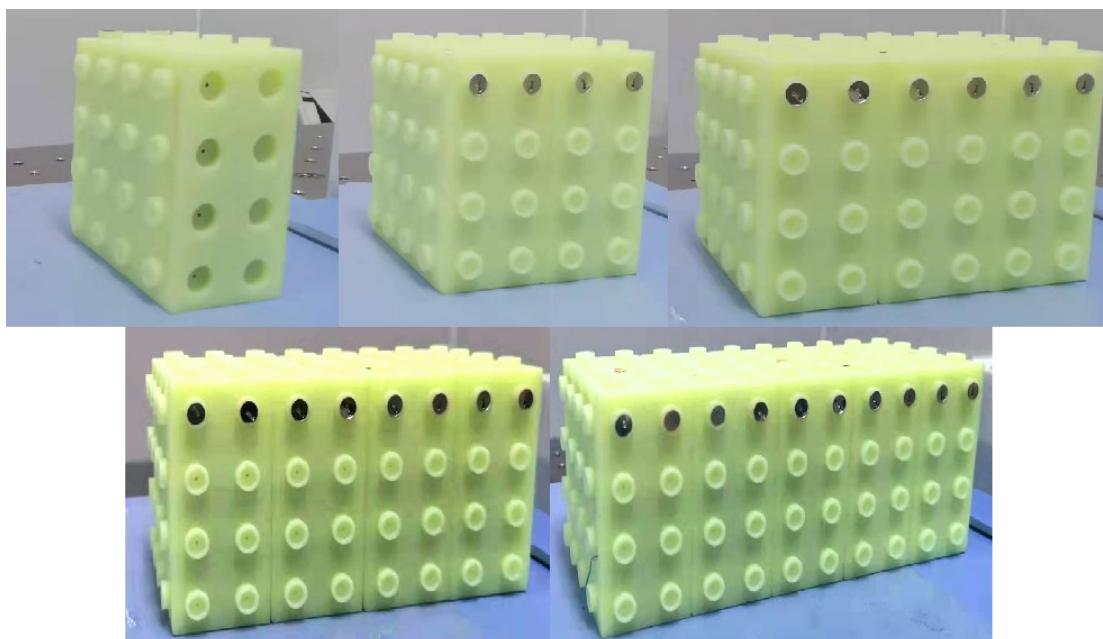

**Fig. S9** Physical photo of different numbers of LI-TENG in parallel in the horizontal direction.

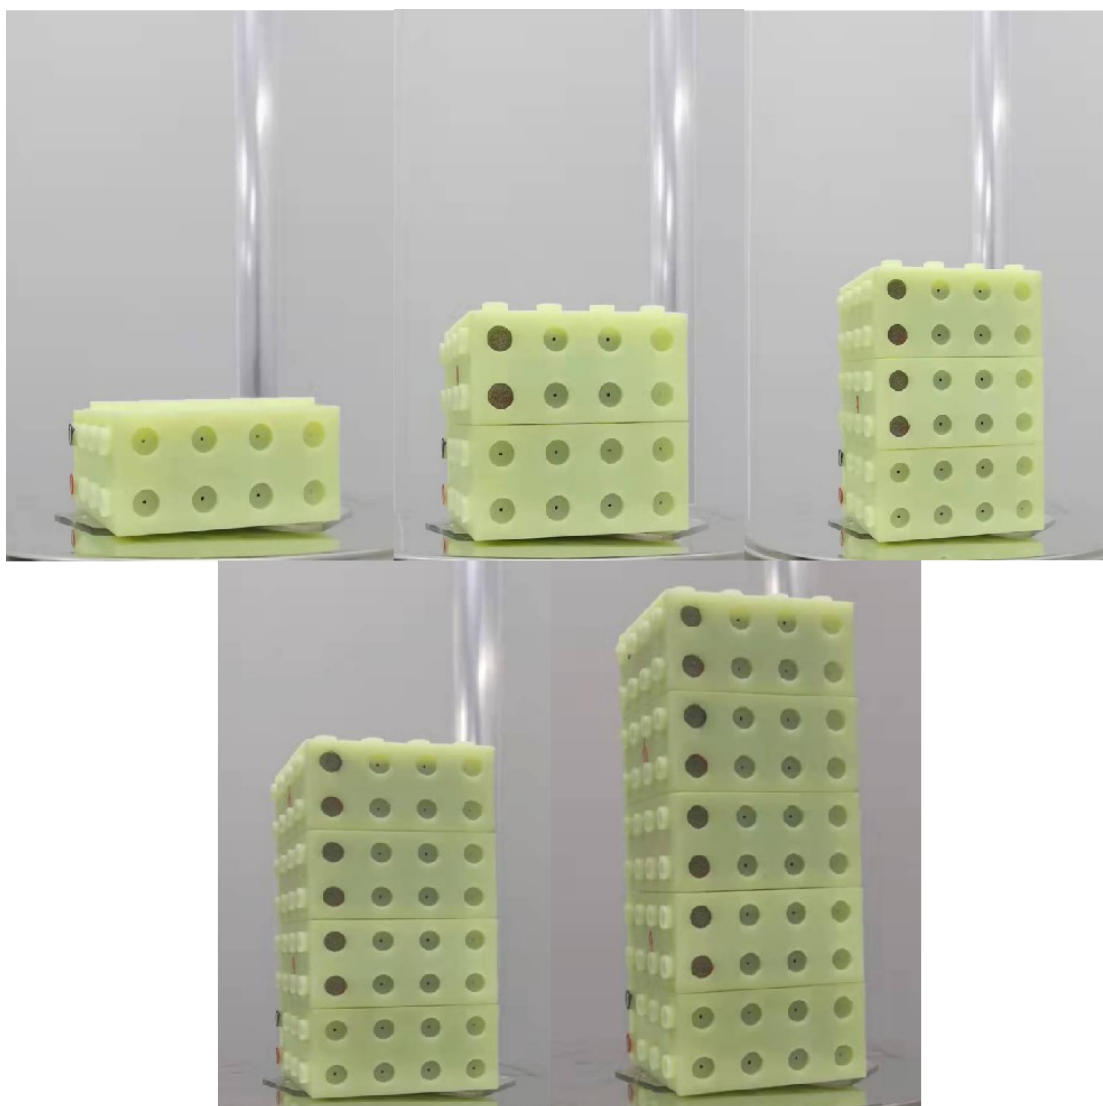

**Fig. S10** Physical photos of different numbers of LI-TENG in parallel in the vertical direction.

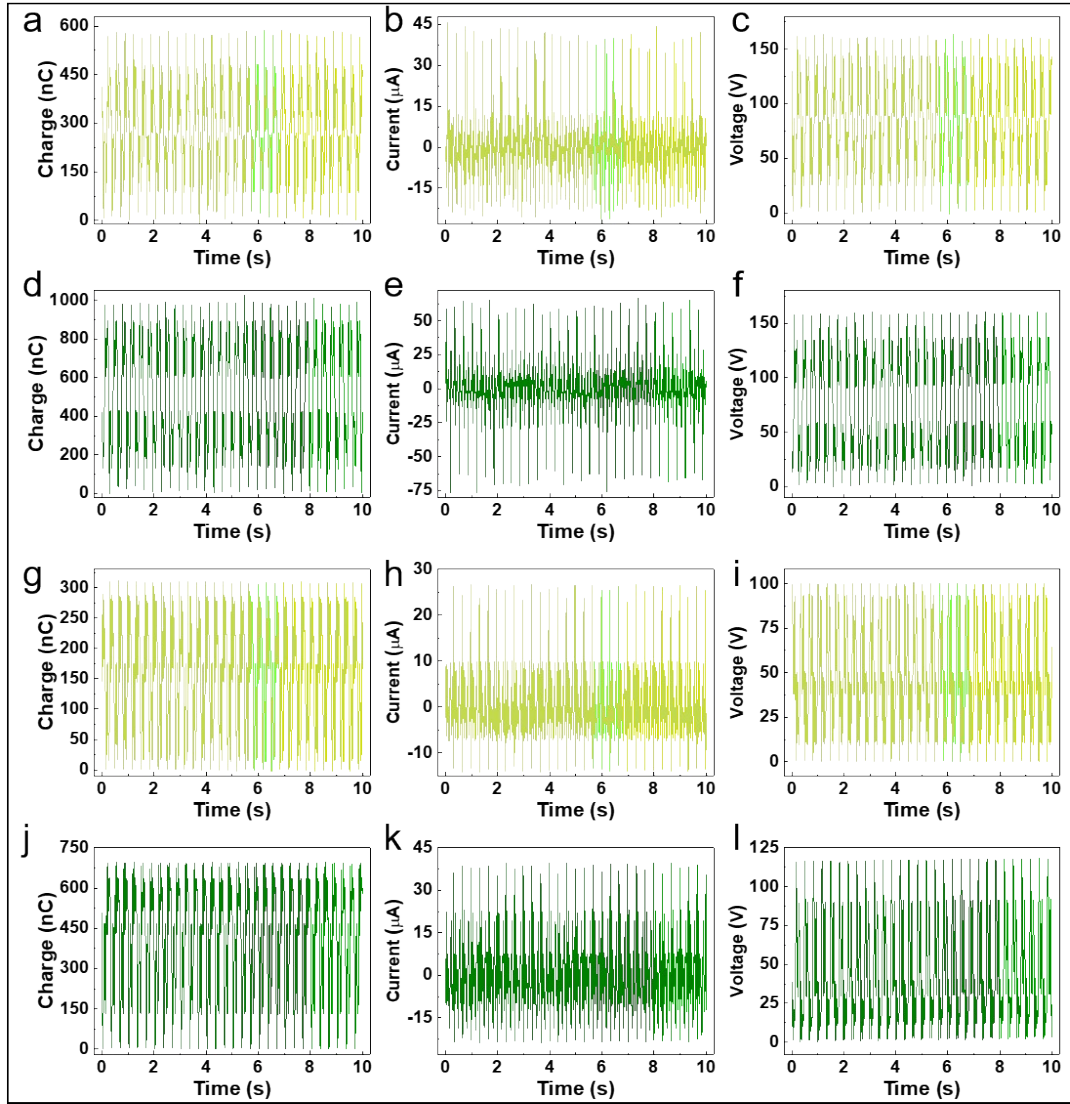

**Fig. S11** Output curves for a single LI-TENG and two LI-TENGs in the horizontal and vertical directions. (a-c) Charge, current, and voltage output curves for a single LI-TENG in the horizontal direction. (d-f) Charge, current, and voltage output curves for two LI-TENGs in the horizontal direction. (g-i) Charge, current, and voltage output curves for a single LI-TENG in the vertical direction. (j-l) Charge, current, and voltage output curves for two LI-TENGs in the vertical direction.

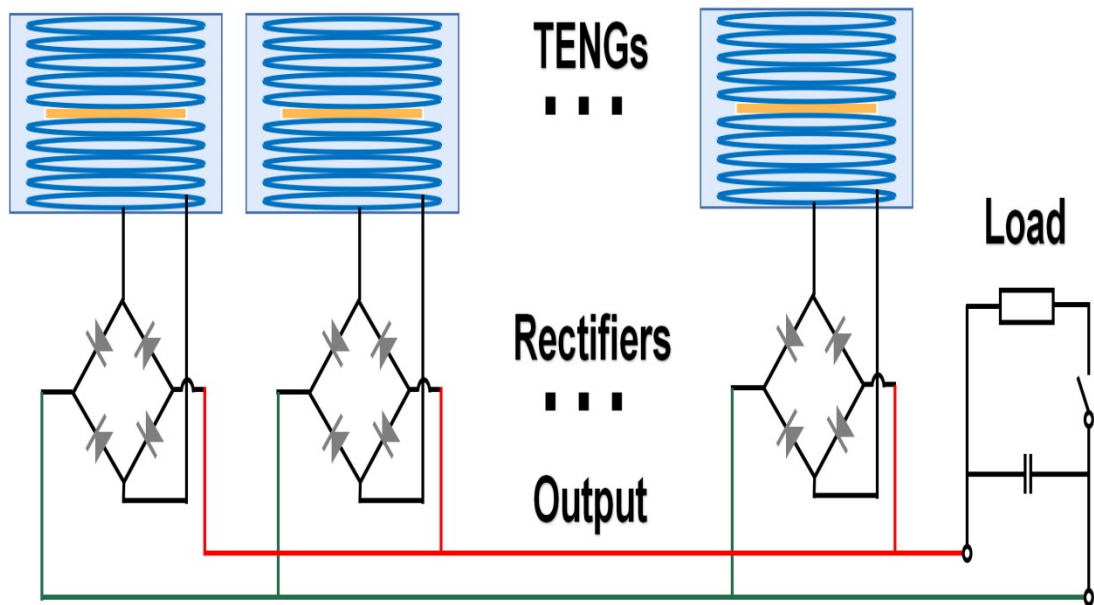

**Fig. S12** Schematic diagram of the parallel circuit of LI-TENGs.



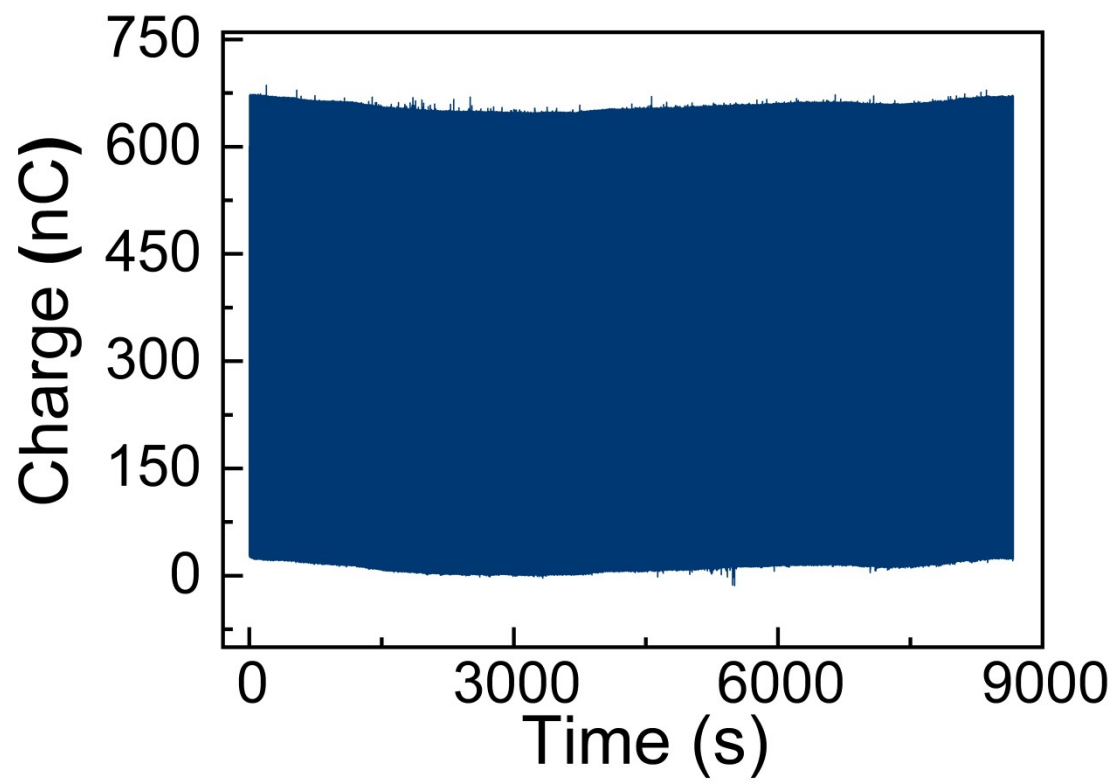

**Fig. S13** LI-TENG short-circuit charge transfer amount operating at 26,000 cycles with linear motor horizontal reciprocating motion (20mm 3Hz).

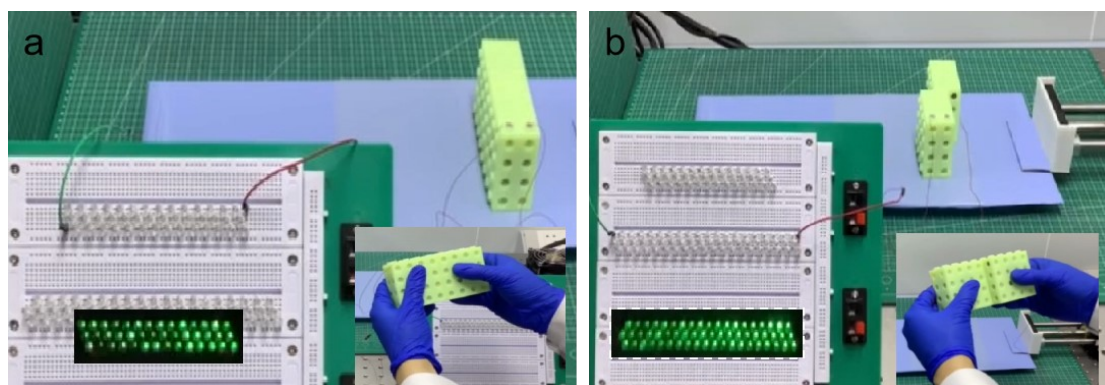

**Fig. S14** Two types of splicing demonstration photos between LI-TENG. (a) parallel splicing. (b) series splicing.

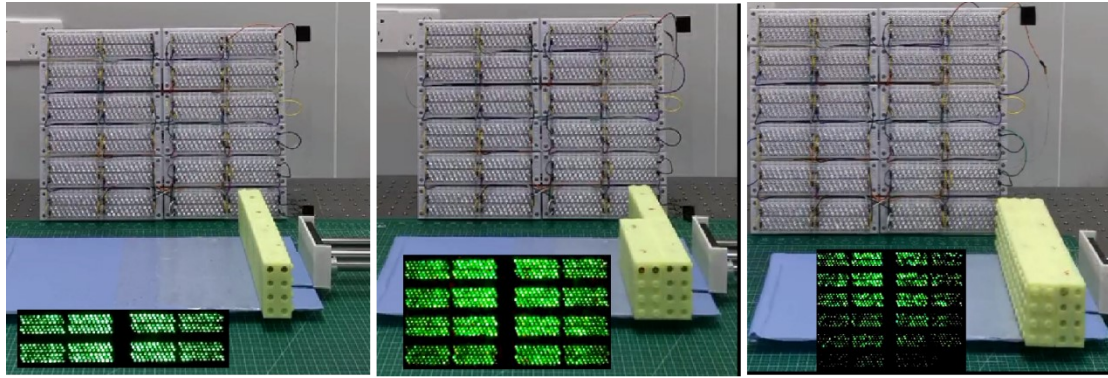

**Fig. S15** Four, six, and eight LI-TENGs are stacked in parallel to light up 480, 960, and 1440 LEDs under the horizontal mechanical vibration of the linear motor.

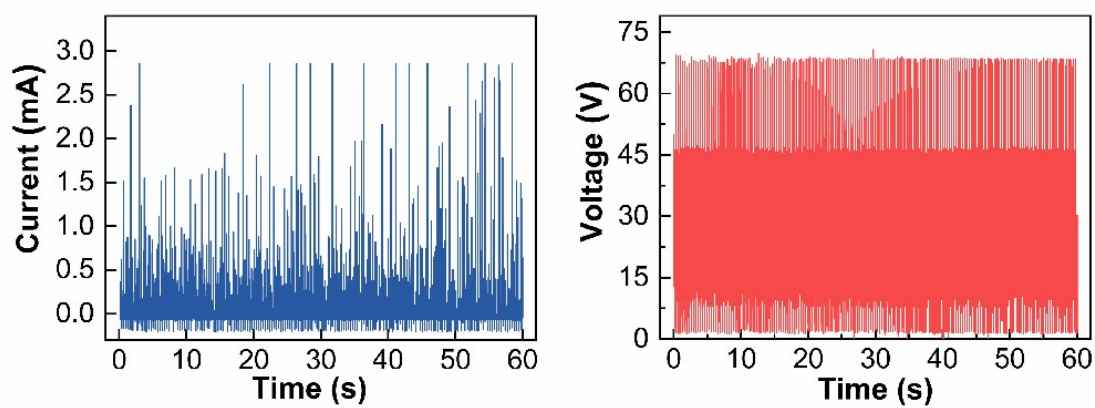

**Fig. S16** Output current and voltage of 12 LI-TENG assembled and stacked into L-shaped squares under mechanical vibration of the linear motor in the vertical direction.

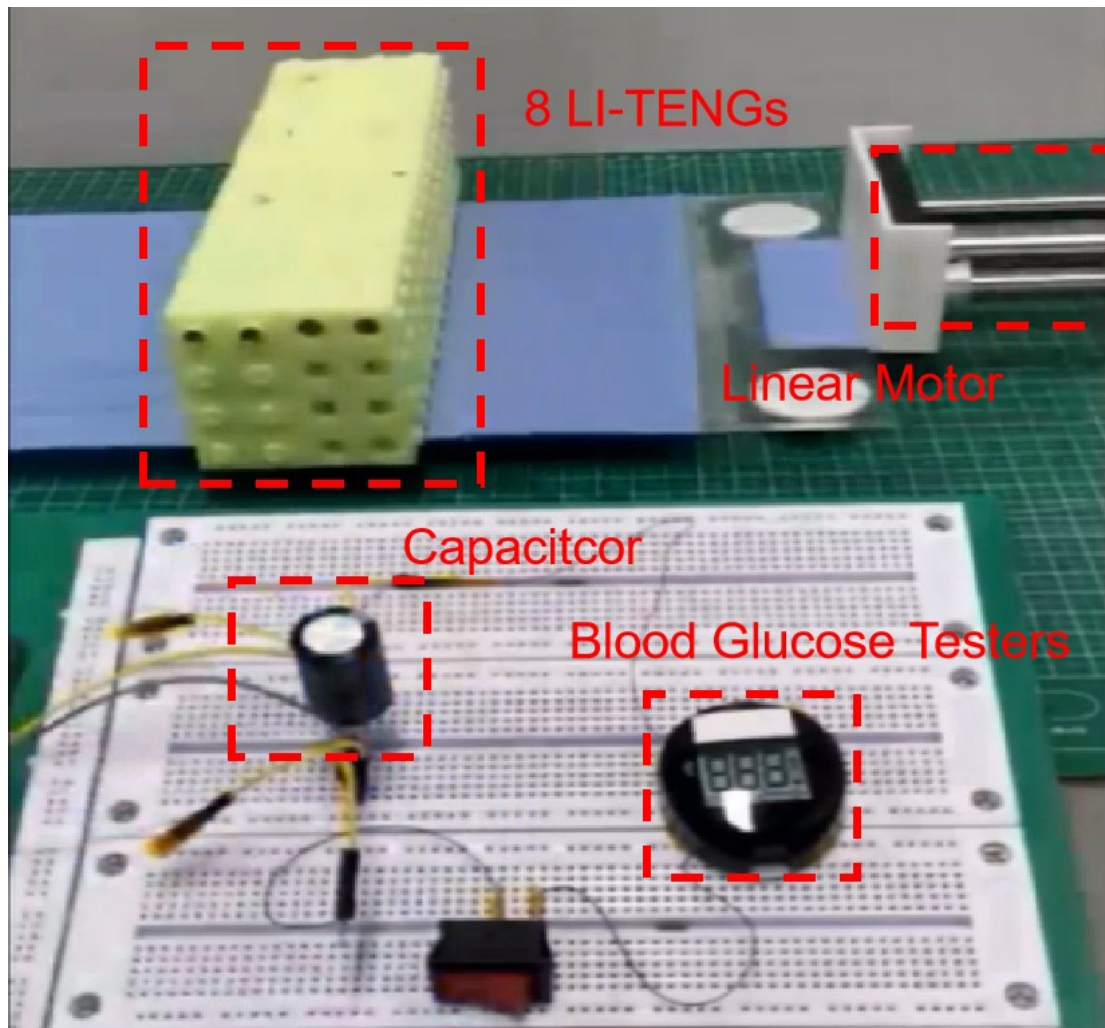

**Fig. S17** 8 LI-TENGs drive a portable blood glucose meter after charging a 2.2mF capacitor to 3.5V for 410 seconds under the horizontal reciprocating motion of a linear motor.



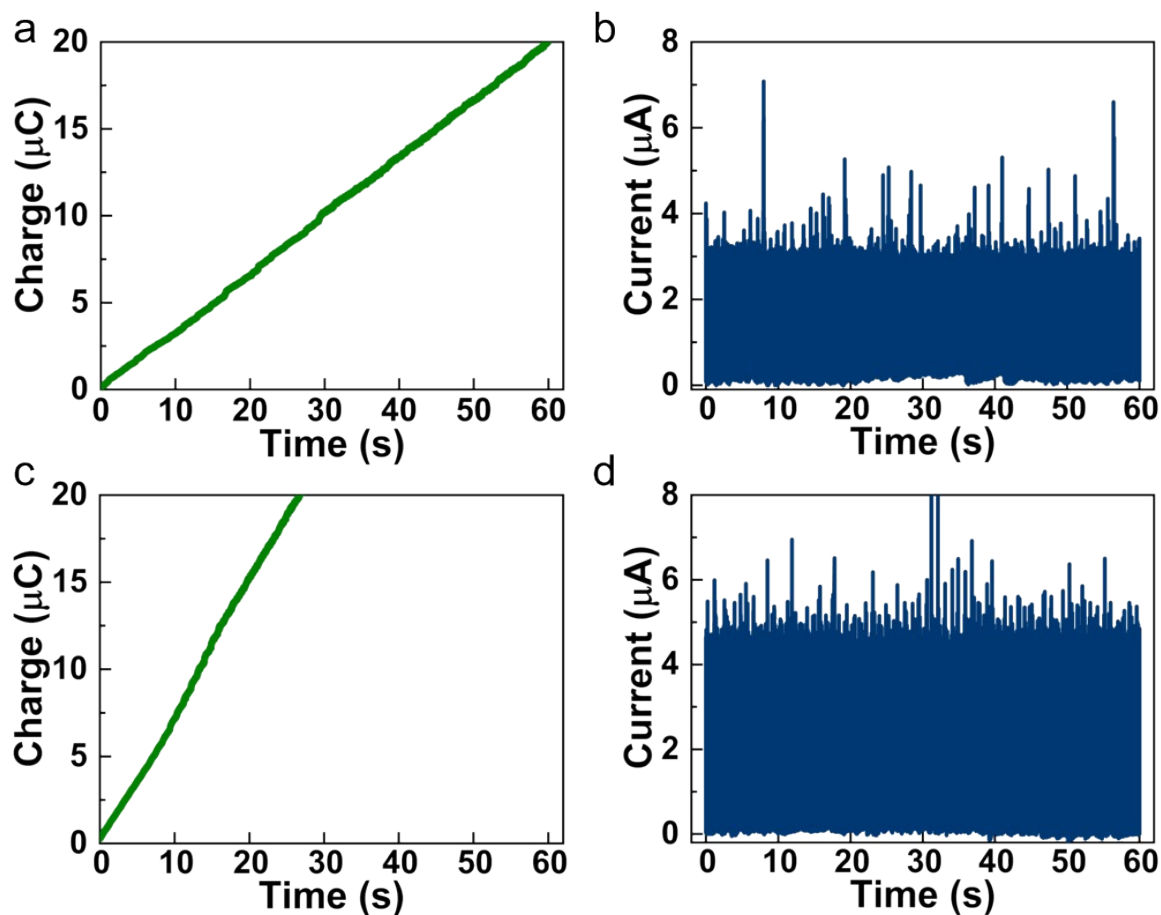

**Fig. S18** The output performance of LI-TENGs driven by 1 Hz water waves in a wave-making pool. (a) charge transfer. (b) short-circuit current for a single LI-TENG. (c) charge transfer. (d) short-circuit current for 4 LI-TENGs.

**Table S1.** Charge, current, and voltage output for ten different units in a single LI-TENG

|                                         | Unit<br>1 | Unit<br>2 | Unit<br>3 | Unit<br>4 | Unit<br>5 | Unit<br>6 | Unit<br>7 | Unit<br>8 | Unit<br>9 | Unit<br>10 |
|-----------------------------------------|-----------|-----------|-----------|-----------|-----------|-----------|-----------|-----------|-----------|------------|
| <b>Charge (nC)</b>                      | 68        | 53        | 56        | 62        | 64        | 57        | 63        | 67        | 64        | 66         |
| <b>Current (<math>\mu</math>A<br/>)</b> | 5.2       | 4.0       | 4.4       | 4.7       | 4.9       | 4.2       | 4.9       | 5.1       | 5.0       | 5.1        |
| <b>Voltage (V)</b>                      | 166       | 150       | 155       | 158       | 162       | 154       | 161       | 167       | 163       | 164        |

**Supplementary Videos:**

Video S1: LI-TENGs series and parallel splicing demonstration.

Video S2: Different numbers of LI-TENGs in parallel light up the LEDs.

Video S3: 12 LI-TENGs in a L-shaped square charge 940  $\mu\text{F}$  capacitors to 3.5 V to drive two electronic calculators and an electronic thermohygrometer.

Video S4: LI-TENGs harvest mechanical energy to drive portable electronic glucose meters.

Video S5: LI-TENGs harvest the mechanical energy of a bicycle in motion to power the nighttime warning light.
